# Supplementary material for: Oxidized SOD1 accelerates cellular senescence in neural stem cells
Source: Springer Nature journal article supplement (doi:10.1186/s13287-024-03669-5), 2024-02-27
Supplement: 13287_2024_3669_MOESM1_ESM.pdf [file 13287_2024_3669_MOESM1_ESM.pdf]

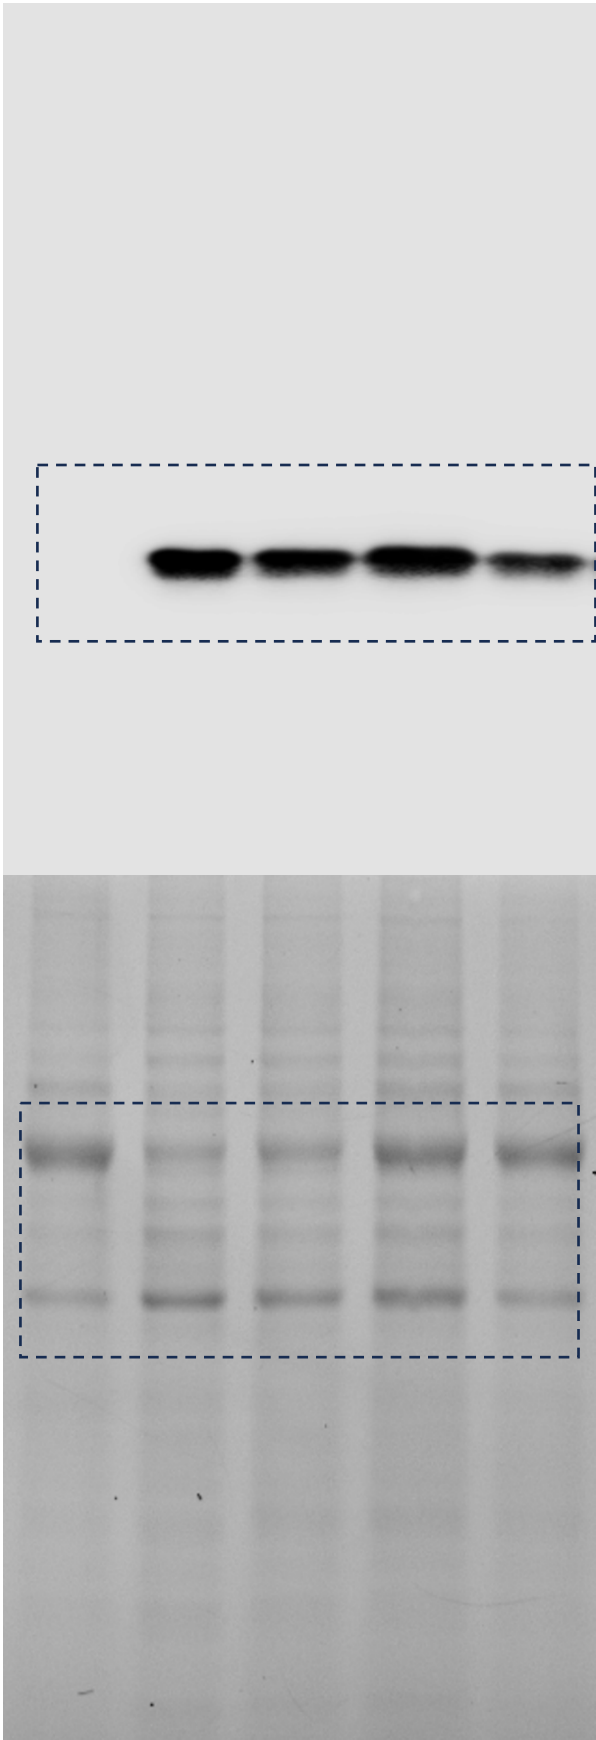

Fig. 1, D

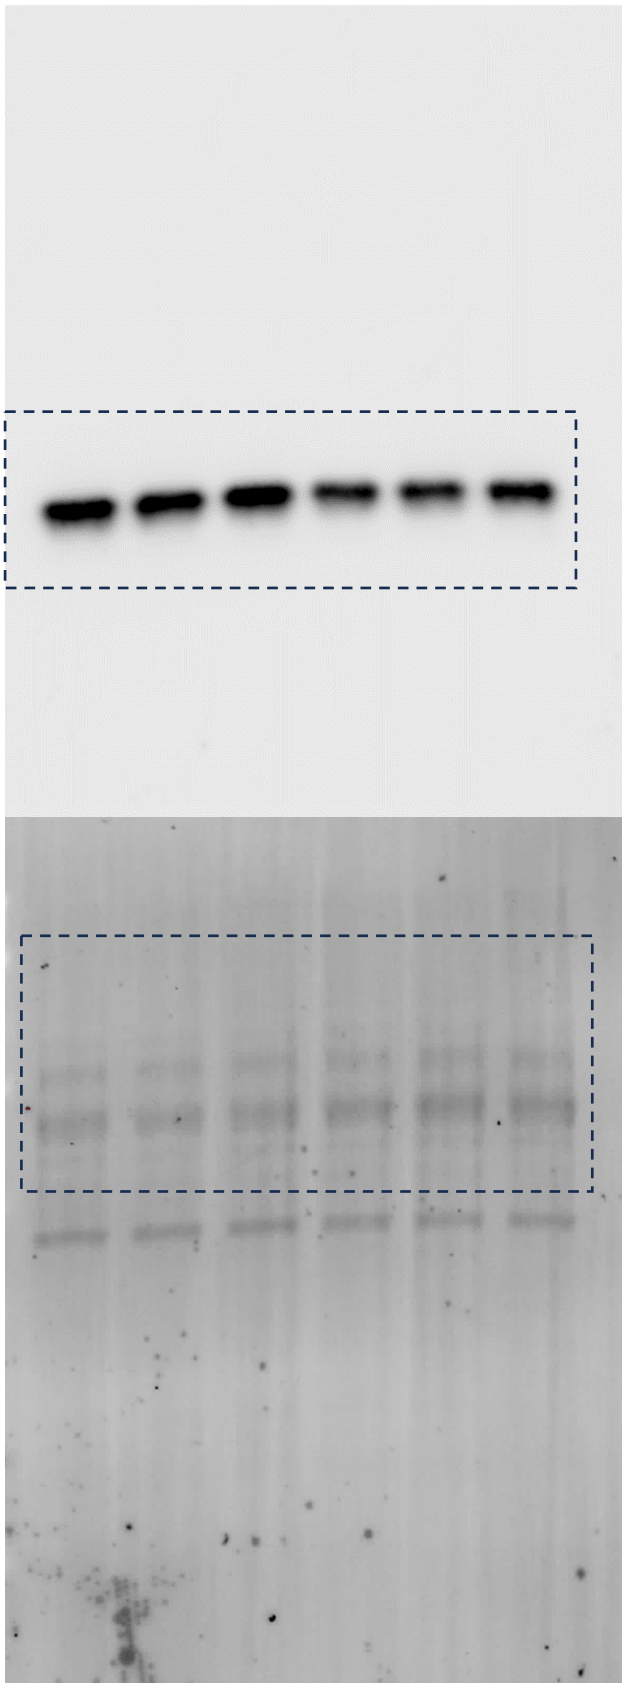

Fig. 1 F

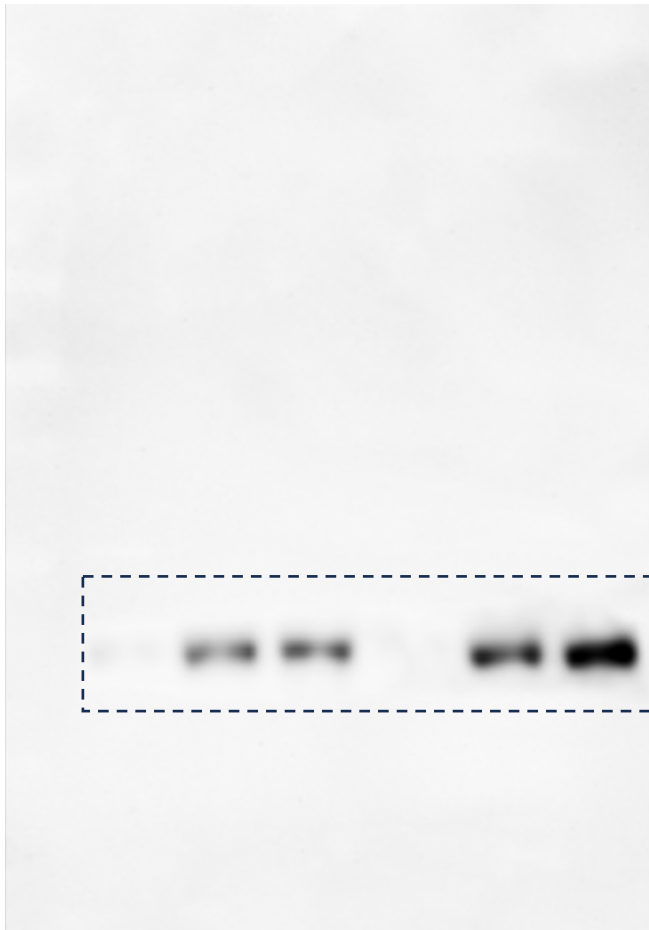

Fig. 2 C

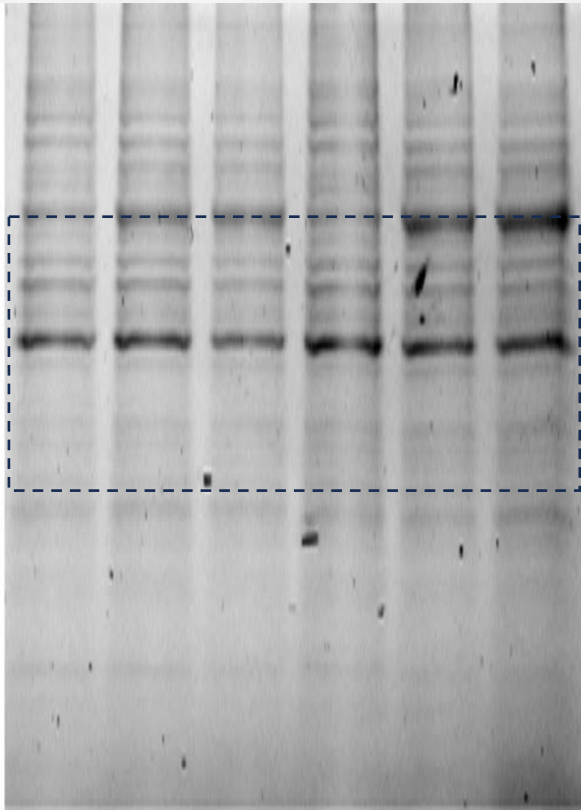

P16

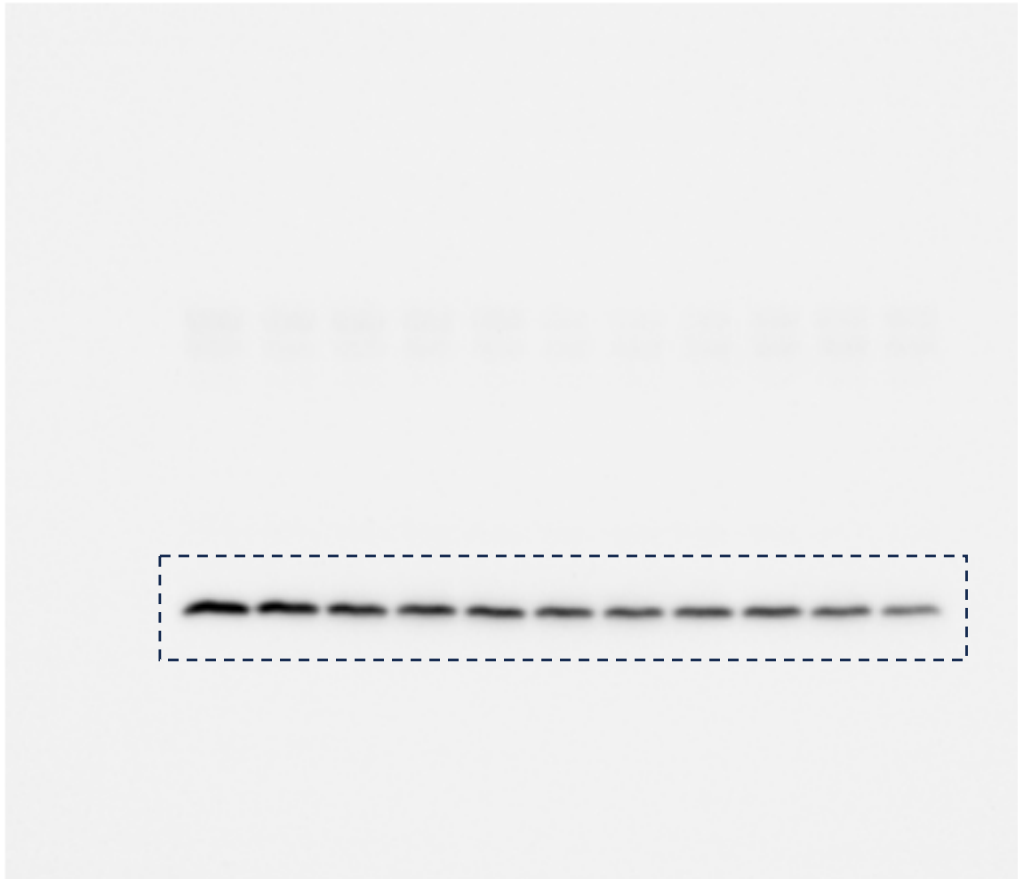

Fig. 2 E

P53

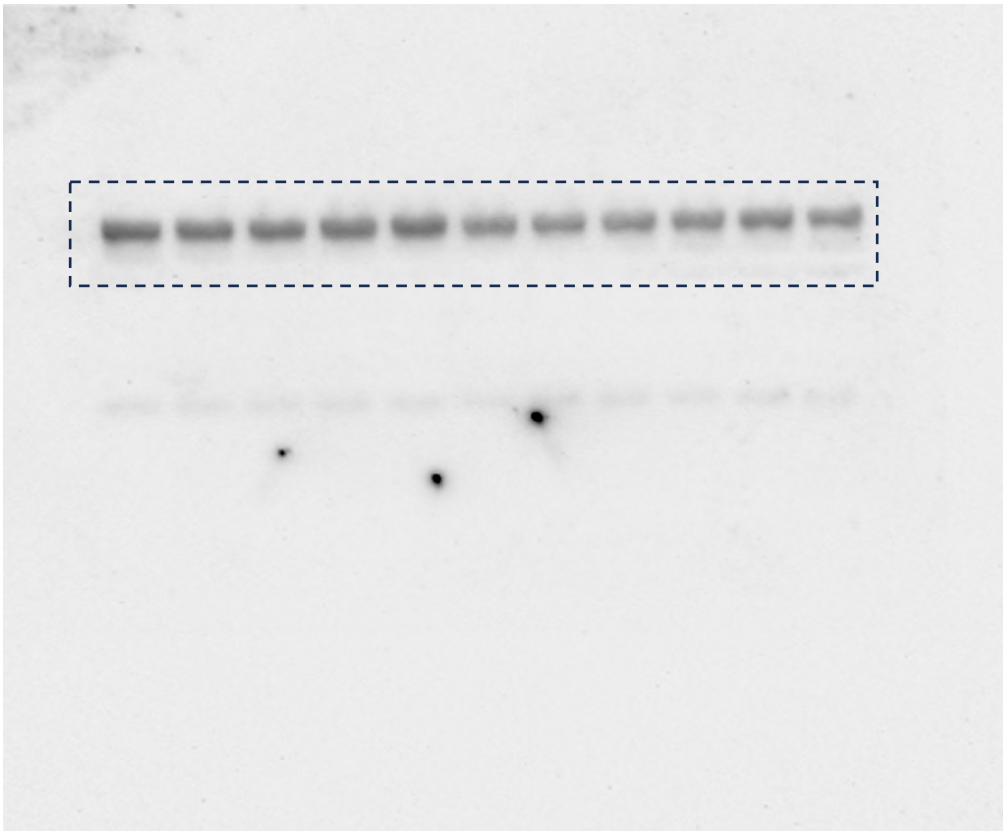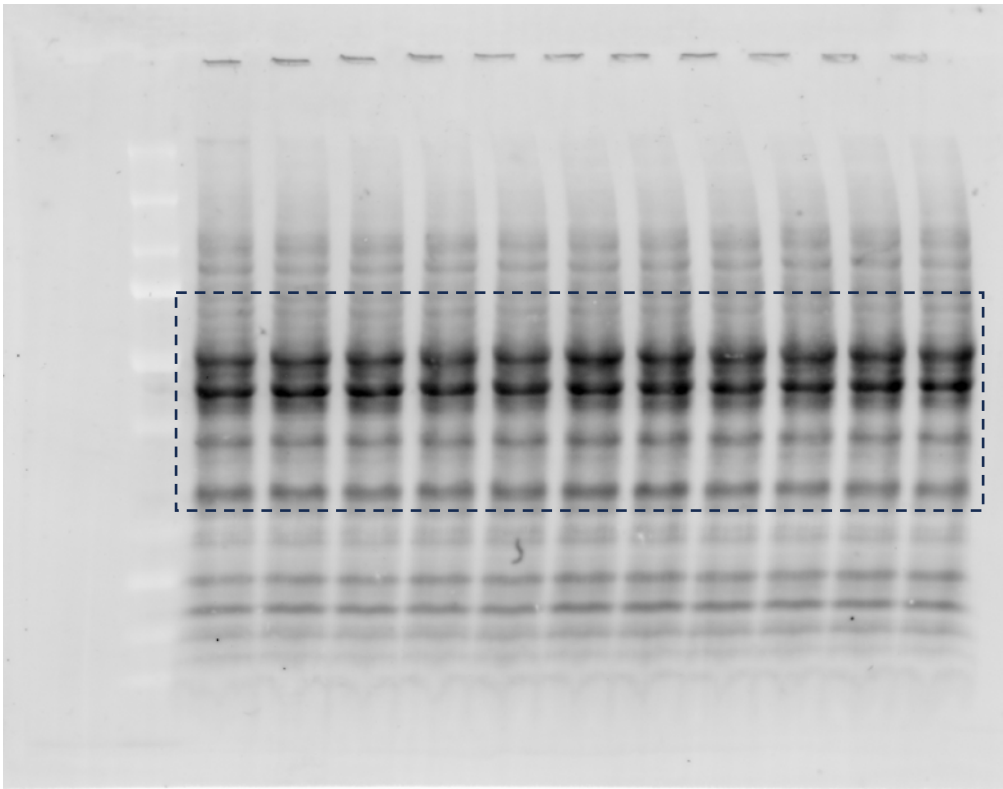

Fig. 2 E

Fig. 3 A

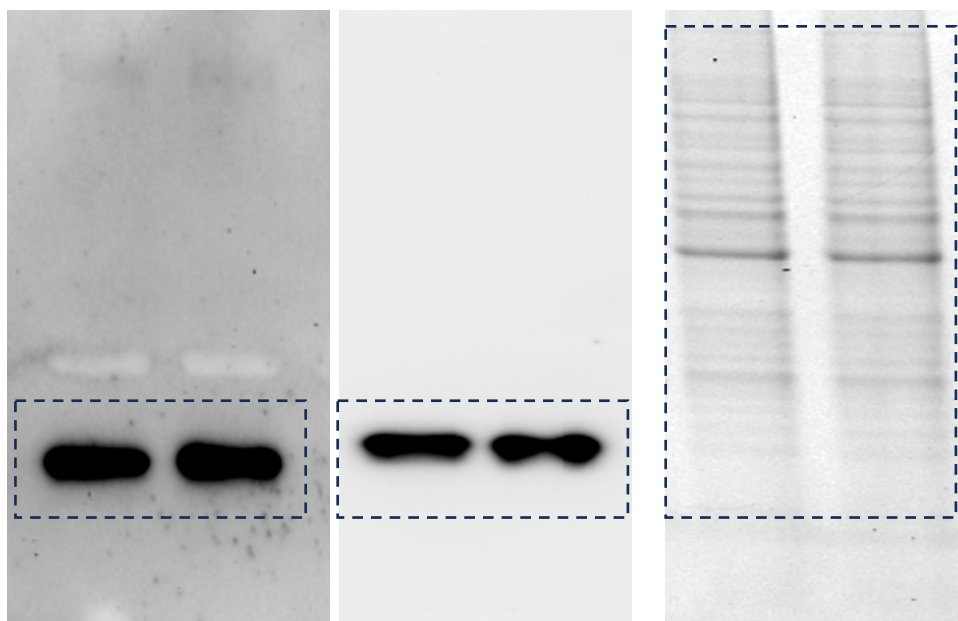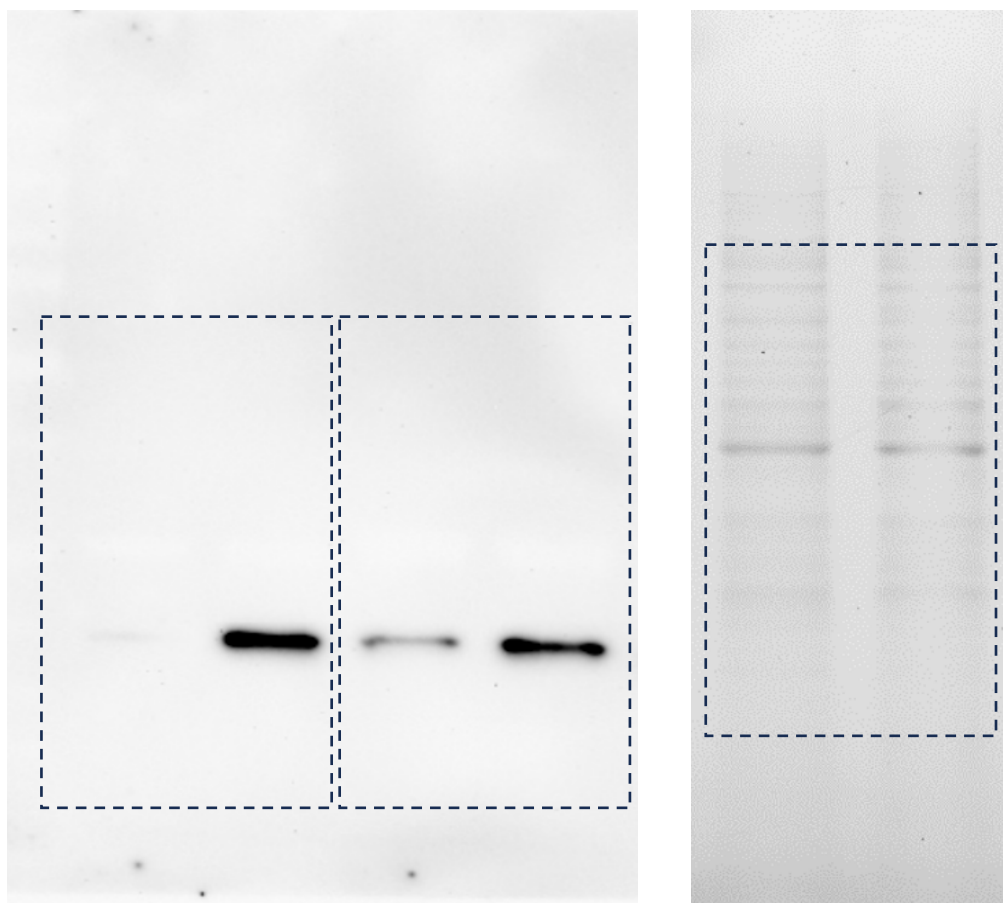

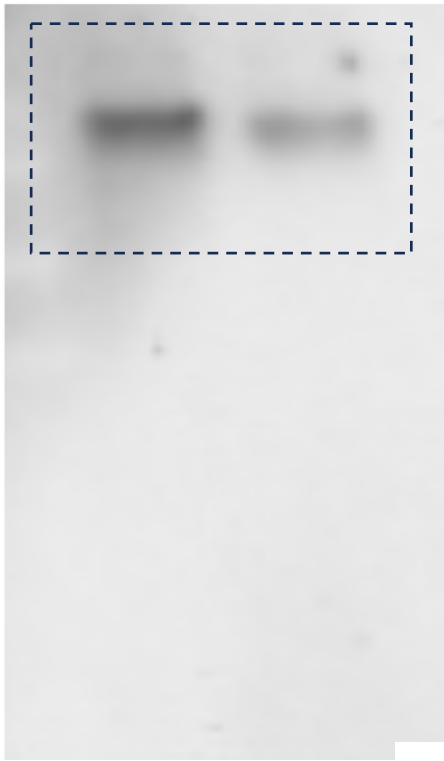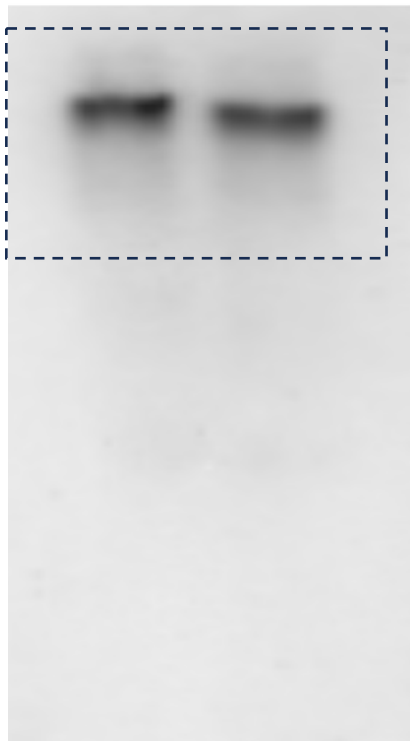

Fig. 3 D

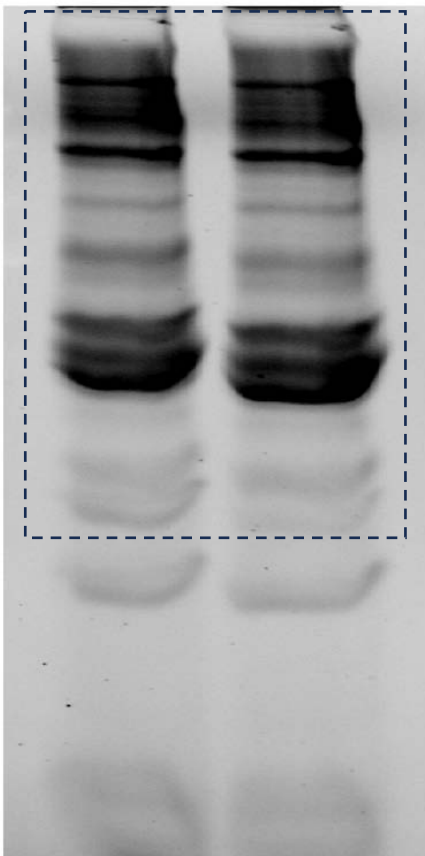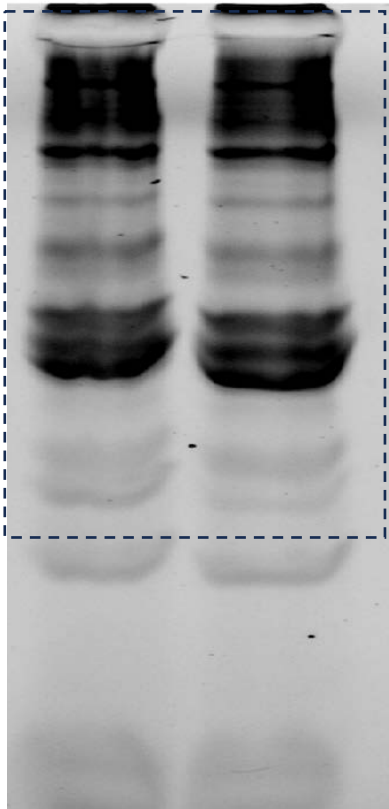

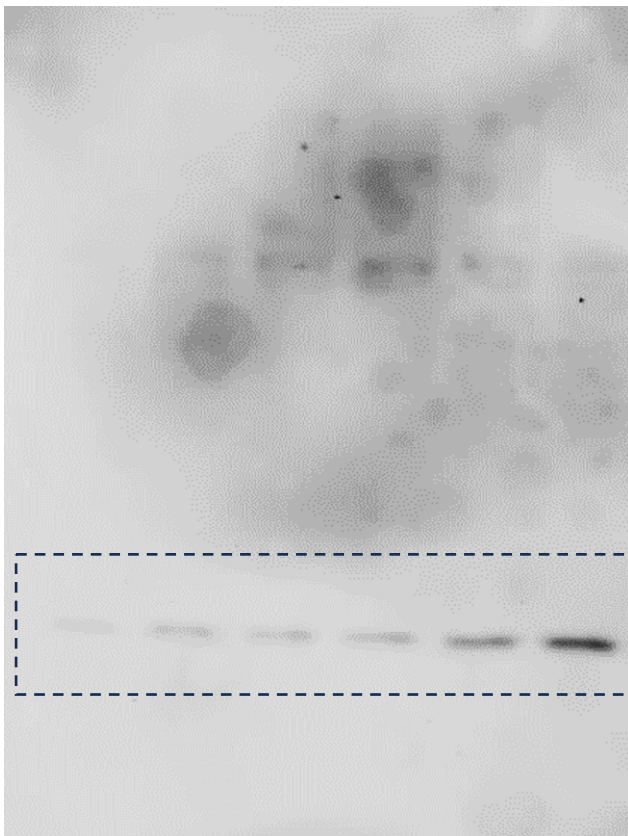

Fig. 4 B

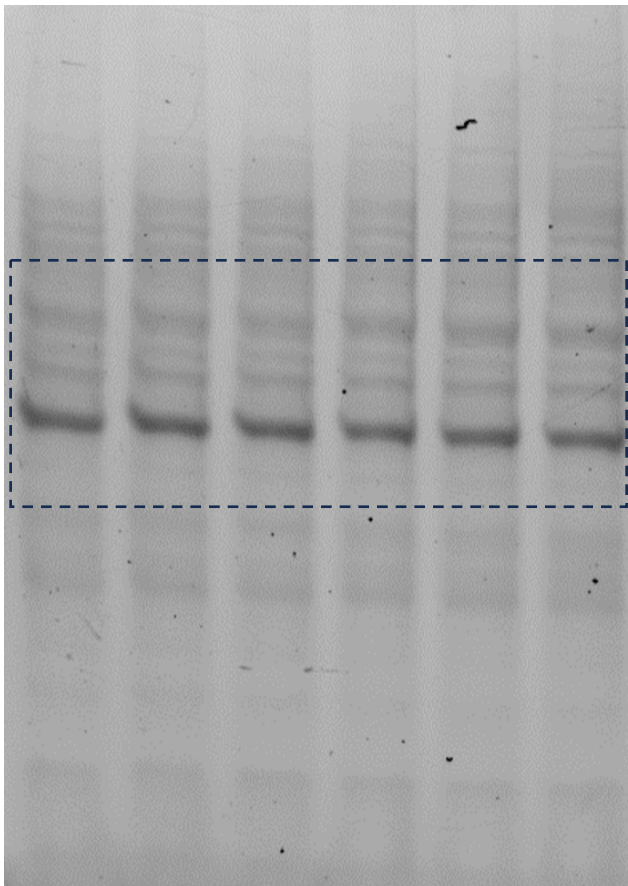



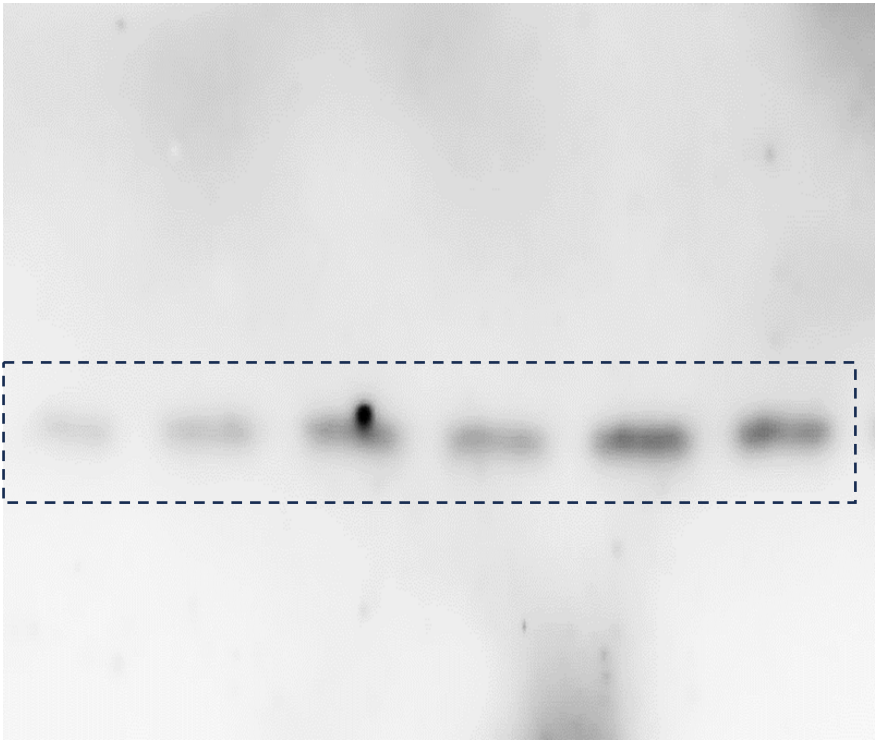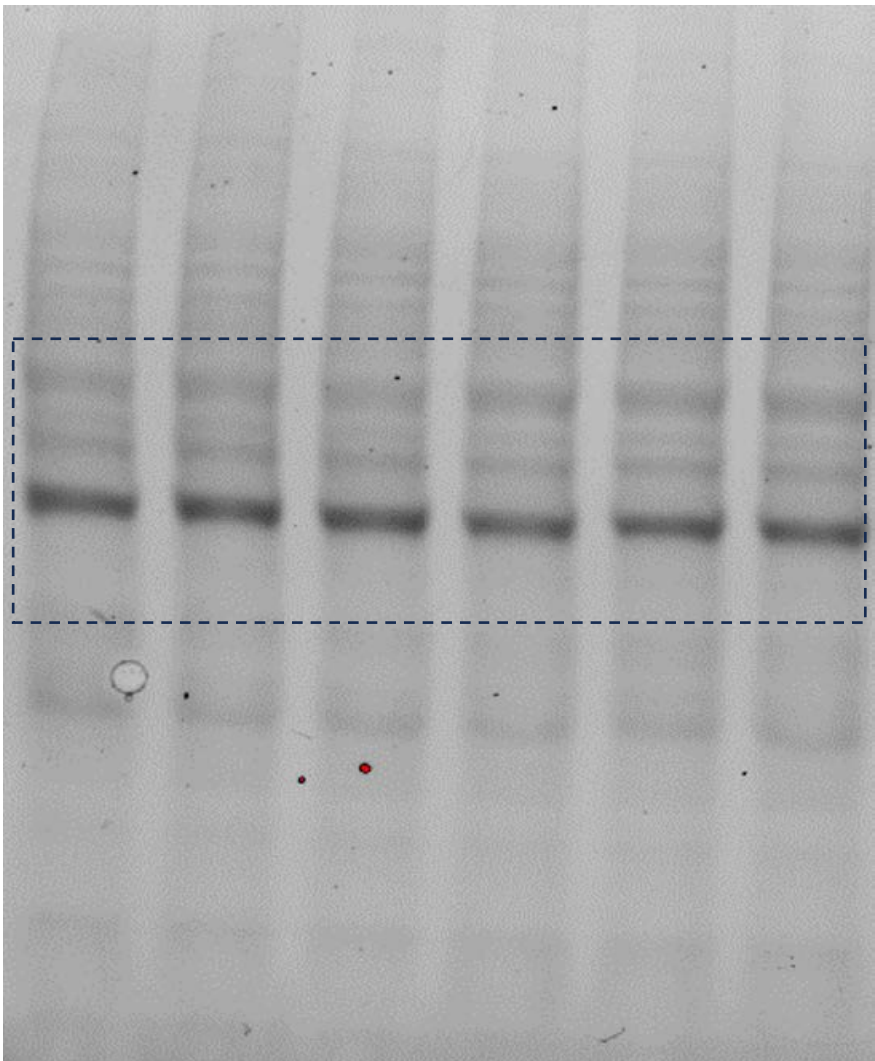

Fig. 4 C

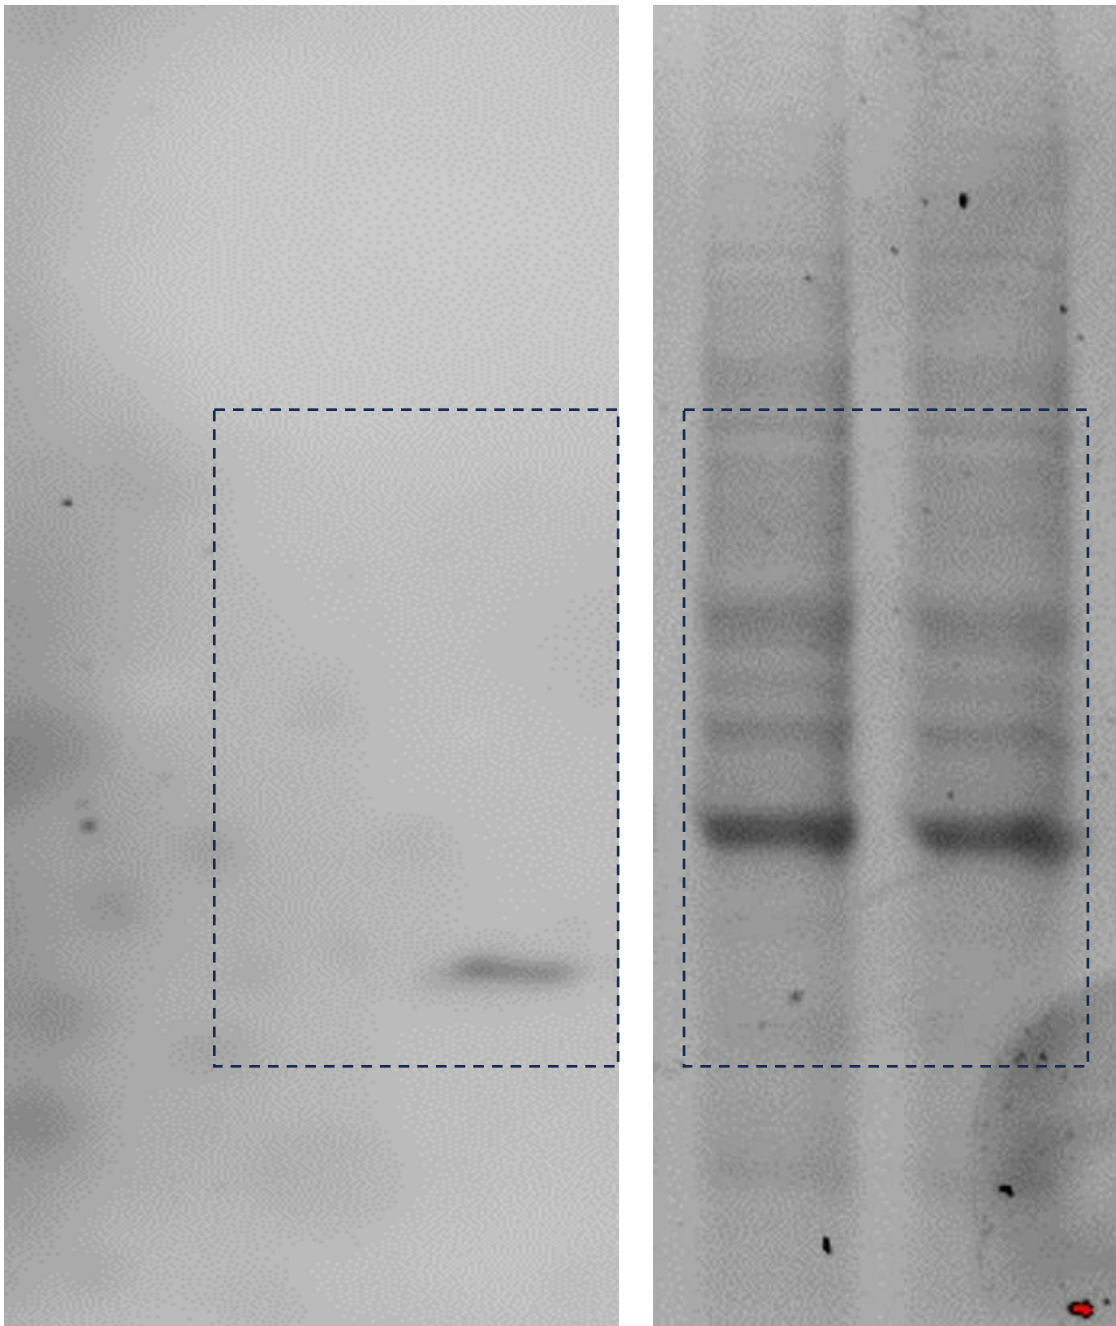

Fig. 4 D

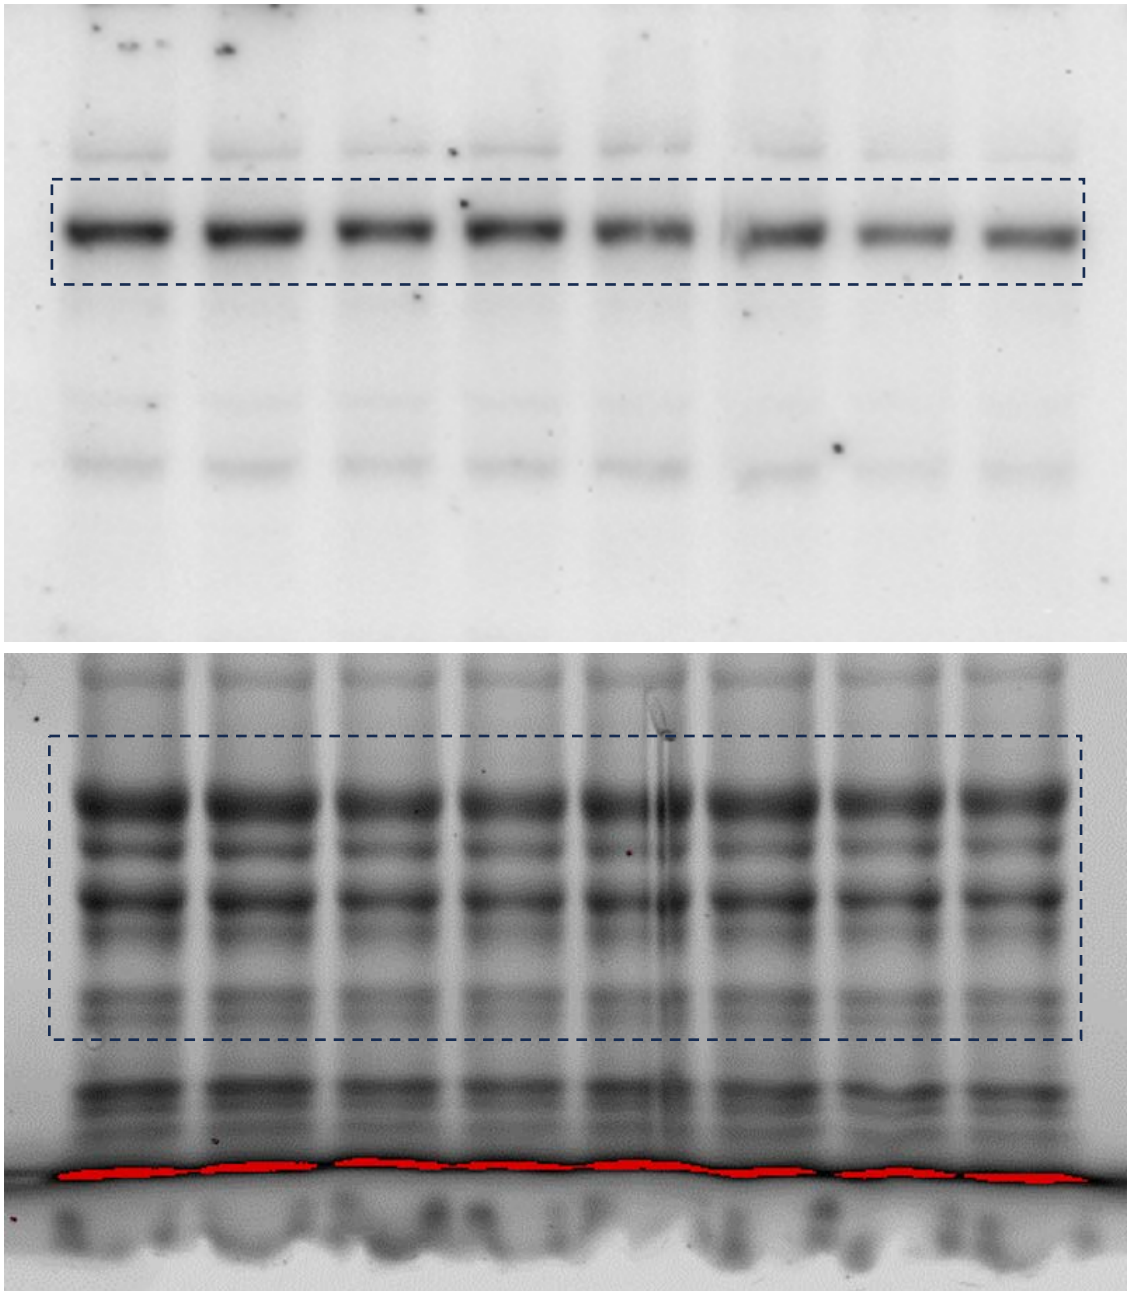

Fig. 6 A
